# Supplementary material for: Persistent Parental RNAi in the Beetle Tribolium castaneum Involves Maternal Transmission of Long Double‐Stranded RNA
Source: PubMed Central journal article supplement (PMC9744488; doi:10.1002/ggn2.202100064), 2022-03-20
Supplement: GGN2-3-2100064-s002.pdf [file GGN2-3-2100064-s002.pdf]

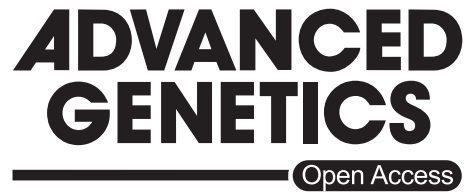

## Supporting Information

for *Advanced Genetics*, DOI 10.1002/ggn2.202100064

Persistent Parental RNAi in the Beetle *Tribolium castaneum* Involves Maternal Transmission of Long Double-Stranded RNA

*Thorsten Horn, Kalin D. Narov and Kristen A. Panfilio\**

# **Persistent parental RNAi in the beetle *Tribolium castaneum* involves maternal transmission of long double-stranded RNA**

## **Supporting Information**

Figure S1. Additional phylogenies with species subsampling for SID-1/SIL proteins.

Figure S2. Negative correlation of nested RT-qPCR amplicon length and detection of dsRNA.

Table S1. Primers used in this study.

Table S2. Genome assembly versions queried by BLAST.

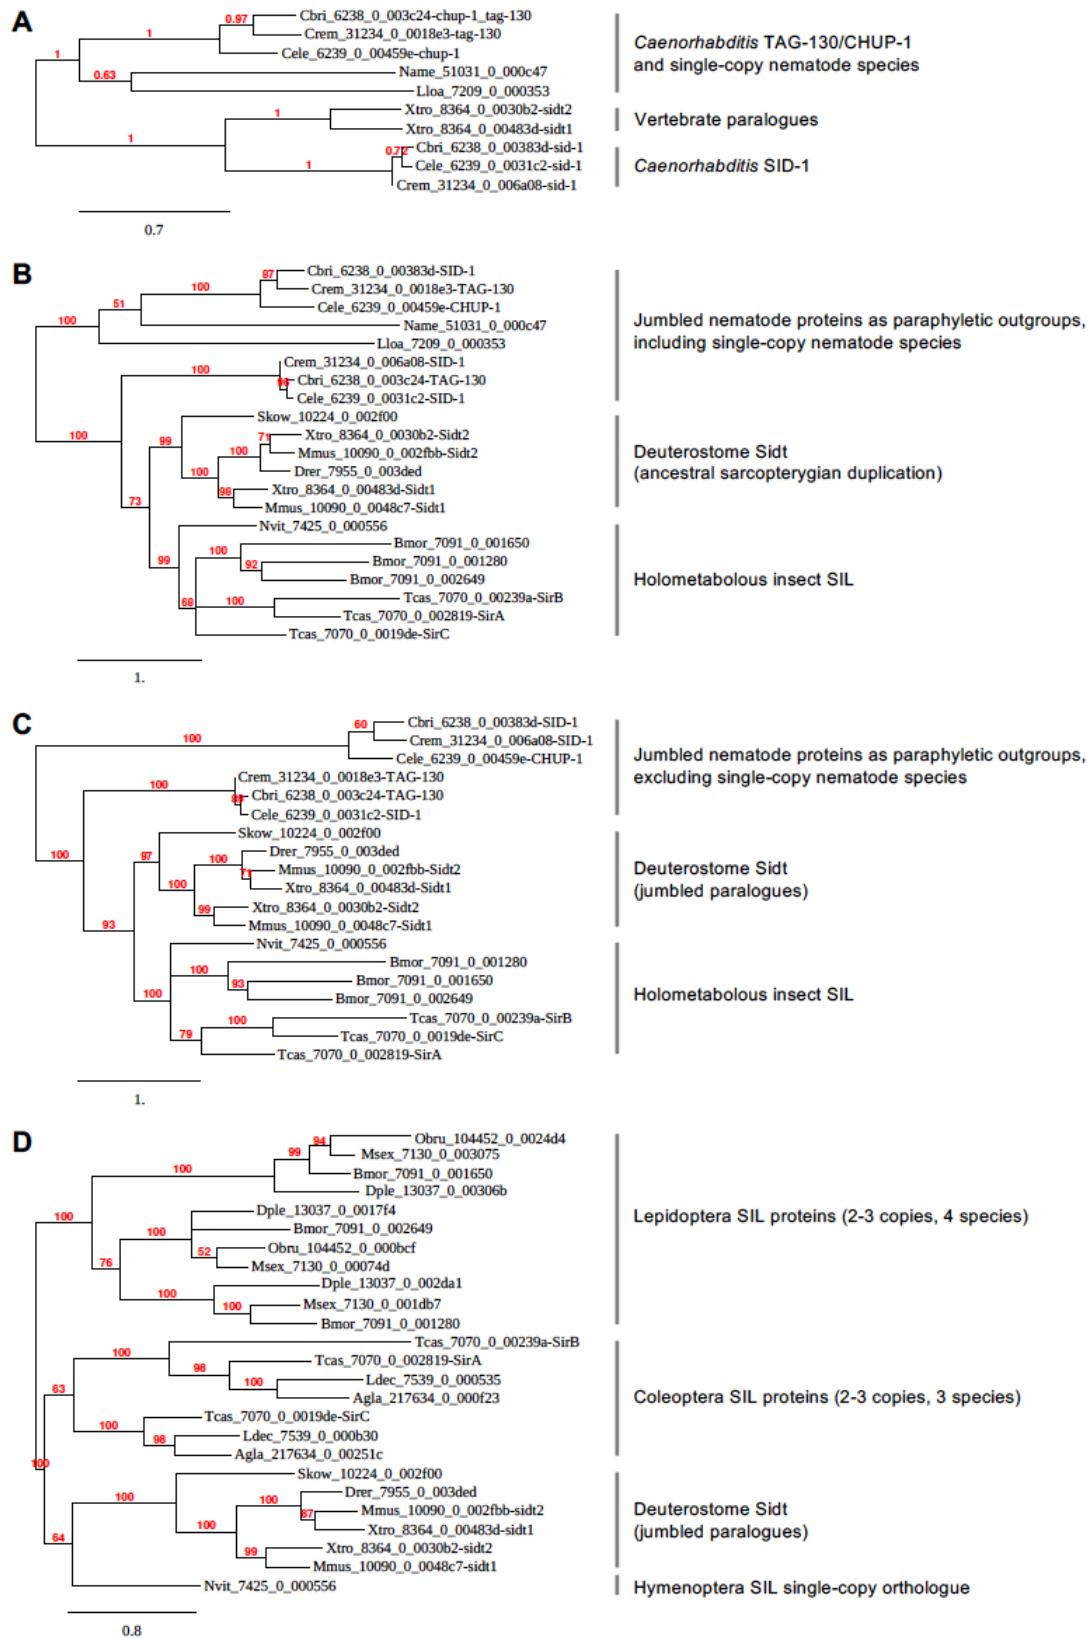

**Figure S1. Additional phylogenies with species subsampling for SID-1/SIL proteins.** (A-D) Maximum likelihood phylogenies of selected SID-1 homologues. The branch length unit represents substitutions per site. All nodes have  $\geq 50\%$  support. The designation “jumbled” highlights clades that conflate distinct genes (nematode SID-1 with TAG-130/CHUP-1, vertebrate Sidt1 with Sidt2), which did not occur across all trees.

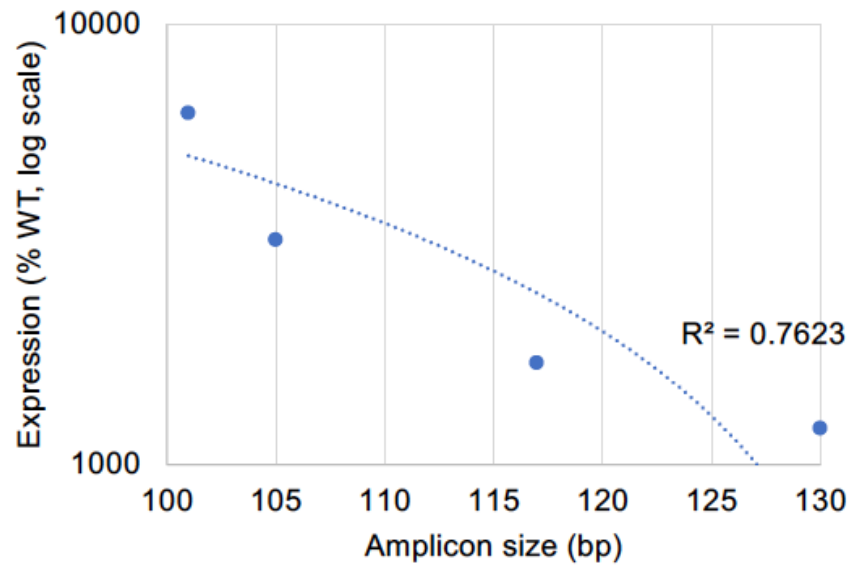

**Figure S2. Negative correlation of nested RT-qPCR amplicon length and detection of dsRNA** (expression in excess of WT), assayed for *Tc-zen1* at 16-24 h, as in main text Figure 1C. Fragments 3 and 4 are shorter than Fragments 2 and 5. Logarithmic trendline for mean expression level (% WT) vs. amplicon length:  $R^2 = 0.76$ .

**Table S1. Primers used in the study.** Note that primers for RNAi (dsRNA synthesis) also included an adapter sequence, 5'-GGCCGCGG-3' (forward primers) or 5'-CCCGGGGC-3' (reverse primers), for subsequent amplification with T7 promoter universal primers (adapters not shown in table). The T7 universal primers are: 5'-universal primer 5'-GAGAATTCTAATACGACTCACTATAGGGCCGCGG-3', and 3'-universal primer 5'-AGGGATCCTAATACGACTCACTATAGGGCCCGGGGC-3'.

| Application    | Gene and fragment ID                   | Primer direction      | Sequence (5' to 3')    | Amplicon length (bp) |
|----------------|----------------------------------------|-----------------------|------------------------|----------------------|
| <b>RNAi</b>    |                                        |                       |                        |                      |
|                | <i>Tc-zen1</i> (TC000921)              | forward               | TCCCAATTTGAAAACCAAGC   | 688                  |
|                |                                        | reverse               | CGTTCCACCCTTCCTGATAA   |                      |
|                | <i>Tc-chs1</i> (TC014634)              | forward (F1)          | CACCAGGACTGTGCA        | 390                  |
|                |                                        | reverse (R1)          | GGCTTTTTGGACGAT        |                      |
|                | <i>DsRed2</i> (EU257621.1)             | forward               | AGTTCATGCGCTTCAAGGTG   | 600                  |
|                |                                        | reverse               | TGGTGTAGTCCTCGTTGTGG   |                      |
|                | <i>Tc-tup</i> (TC033536), <i>NOF 1</i> | forward (F1)          | CGTGCGAGATGGTAAAACCT   | 306                  |
|                |                                        | reverse (R1)          | TTGCTCAAGCTGGTGTGTT    |                      |
|                | <i>Tc-tup</i> (TC033536), <i>NOF 2</i> | forward (F2)          | CACGTTGAGGACGTGCTATG   | 347                  |
|                |                                        | reverse (R2)          | GCTGATGGGGTTGCTCTAAG   |                      |
|                | <i>Tc-gcl</i> (TC001571)               | forward (F1)          | CGTTGATCAGTGGTGTGCA    | 437                  |
|                |                                        | reverse (R1)          | TCGCTTCCTCCAGAAATGT    |                      |
| <b>RT-qPCR</b> |                                        |                       |                        |                      |
|                | <i>Tc-RpS3</i> (TC008261)              | forward               | ACCTCGATACACCATAGCAAGC | 186                  |
|                |                                        | reverse               | ACCGTCGTATTCGTGAATTGAC |                      |
|                | <i>Tc-zen1</i> (5'-3'):                |                       |                        |                      |
|                | Fragment 1 outside dsRNA               | forward               | TCCTGTTGTGAGTCAGTGCA   | 223                  |
|                |                                        | reverse               | CAGTTCCAATCAGAAGGTGGA  |                      |
|                | Fragment 2 inside dsRNA                | forward               | TGAAAACCAAGCCGTTCTGC   | 169                  |
|                |                                        | reverse               | CAGTTCCAATCAGAAGGTGGA  |                      |
|                | Fragment 3 inside dsRNA                | forward               | TCCACCTTCTGATTGGAAGT   | 161                  |
|                |                                        | reverse               | CGTTGGGGTTGAGTTTCTTG   |                      |
|                | Fragment 4 inside dsRNA                | forward               | CGGCCCAATTAGTGGAATTA   | 101                  |
|                |                                        | reverse               | ACGCTCACTCAGGTTCAAGT   |                      |
|                | Fragment 5 inside dsRNA                | forward               | CCATCGACAGTGCAAACCAA   | 130                  |
|                |                                        | reverse               | TCCTCTTGTTTGGGCAAAGC   |                      |
|                | Fragment 6 outside dsRNA               | forward               | CCATCGACAGTGCAAACCAA   | 190                  |
|                |                                        | reverse               | GTTAAAGCAGGCTGGGACAC   |                      |
|                | <i>Tc-chs1</i> (3')                    | forward               | ATTCTGTAACCGGGACCTGG   |                      |
|                |                                        | reverse inside dsRNA  | CCAGAAGGCGAAGATCAAGC   | 100                  |
|                |                                        | reverse outside dsRNA | ATGAGGAAGTGGGAGAAGGC   | 186                  |
|                | <i>DsRed</i> (5')                      | forward inside dsRNA  | AGTTCATGCGCTTCAAGGTG   | 123                  |
|                |                                        | forward outside dsRNA | GCTCCTCCAAGAACGTCATC   | 147                  |
|                |                                        | reverse               | CCTTGGTCACCTTCAGCTTC   |                      |

**Table S2. Genome assembly versions queried by BLAST.** These resources were interrogated with tBLASTn queries for selected SID-1 proteins (see main text Figure 5B). Accessed at the i5K@NAL site, most recent access date: 13 October 2021.

| Taxonomic grouping                        | Species                           | Species abbreviation | Assembly version                                                                                   |
|-------------------------------------------|-----------------------------------|----------------------|----------------------------------------------------------------------------------------------------|
| Paraneoptera > Hemiptera > Sternorrhyncha | <i>Bemisia tabaci</i>             | Btab                 | Genome Assembly - Bemisia tabaci genome assembly GCF_001854935.1 (ASM185493v1)                     |
| Paraneoptera > Hemiptera > Sternorrhyncha | <i>Diaphorina citri</i>           | Dcit                 | Genome Assembly - NCBI-diaci1.1 (Current RefSeq assembly version)                                  |
| Paraneoptera > Hemiptera > Heteroptera    | <i>Gerris buenoi</i>              | Gbue                 | Genome Assembly - Gbue.scaffolds.50_new_ids.fa                                                     |
| Paraneoptera > Hemiptera > Heteroptera    | <i>Cimex lectularius</i>          | Clec                 | Genome Assembly - Clec_Bbug02212013.genome_new_ids.fa                                              |
| Paraneoptera > Hemiptera > Heteroptera    | <i>Halyomorpha halys</i>          | Hhal                 | Genome Assembly - Halyomorpha halys genome assembly GCA_000696795.3                                |
| Paraneoptera > Hemiptera > Heteroptera    | <i>Oncopeltus fasciatus</i>       | Ofas                 | Genome Assembly - Ofas.scaffolds_new_ids.fa                                                        |
| Paraneoptera > Thysanoptera               | <i>Frankliniella occidentalis</i> | Focc                 | Genome Assembly - Frankliniella occidentalis genome assembly GCA_000697945.4                       |
| Holometabola > Hymenoptera                | <i>Athalia rosae</i>              | Aros                 | Genome Assembly - Aros01112013-genome_new_ids.fa                                                   |
| Holometabola > Coleoptera                 | <i>Anoplophora glabripennis</i>   | Agla                 | Genome Assembly - Agla_Btl03082013.genome_new_ids.fa                                               |
| Holometabola > Coleoptera                 | <i>Leptinotarsa decemlineata</i>  | Ldec                 | Genome Assembly - Leptinotarsa decemlineata genome assembly GCF_000500325.1                        |
| Holometabola > Coleoptera                 | <i>Tribolium castaneum</i>        | Tcas                 | Genome Assembly - Tribolium castaneum genome assembly Tcas5.2 (GCF_000002335.3), genomic scaffolds |
| Holometabola > Diptera                    | <i>Drosophila biarmipes</i>       | Dbia                 | Genome Assembly - Drosophila biarmipes genome assembly GCF_000233415.1                             |
| Holometabola > Diptera                    | <i>Drosophila elegans</i>         | Dele                 | Genome Assembly - Drosophila elegans genome assembly, ASM1815250v1                                 |
| Holometabola > Diptera                    | <i>Drosophila kikkawai</i>        | Dkik                 | Genome Assembly - Drosophila kikkawai genome assembly, ASM1815253v1                                |
